# Supplementary material for: Green-low-cost rechargeable aqueous zinc-ion batteries using hollow porous spinel ZnMn2O4as the cathode material
Source: Royal Society of Chemistry journal article supplement (doi:10.1039/c7ta00100b), 2017-01-01
Supplement: c7ta00100b1.pdf [file c7ta00100b1.pdf]

## Supporting Information

# A Green-Low-Cost Rechargeable Zn-ion Aqueous Battery Using Hollow Porous Spinel ZnMn<sub>2</sub>O<sub>4</sub> as the Cathode Material

Xianwen Wu<sup>a, b, c\*</sup>, Yanhong Xiang<sup>a</sup>, Qingjing Peng<sup>a, b, c</sup>, Xiangsi Wu<sup>a</sup>, Yehua Li<sup>a, b</sup>, Fang Tang<sup>a, b</sup>,  
Runci Song<sup>a, b</sup>, Zhixiong Liu<sup>a</sup>, Zeqiang He<sup>a</sup>, Xianming Wu<sup>a</sup>

The specific capacity of ZnMn<sub>2</sub>O<sub>4</sub> is calculated as follows:

$$\begin{aligned} \text{Specific Capacity (mAh / g)} &= \frac{\text{Number of Electrons} \times \text{Faraday's Constant} \times 1000}{3600 \times \text{Formula Weight}} \\ &= \frac{1.6 \times 10^{-19} \text{ C} \times 6.022 \times 10^{23} \times 2 \times 1000}{3600 \times (65.39 + 54.938 \times 2 + 16 \times 4)} \\ &= 224 \text{ mAh / g} \end{aligned}$$

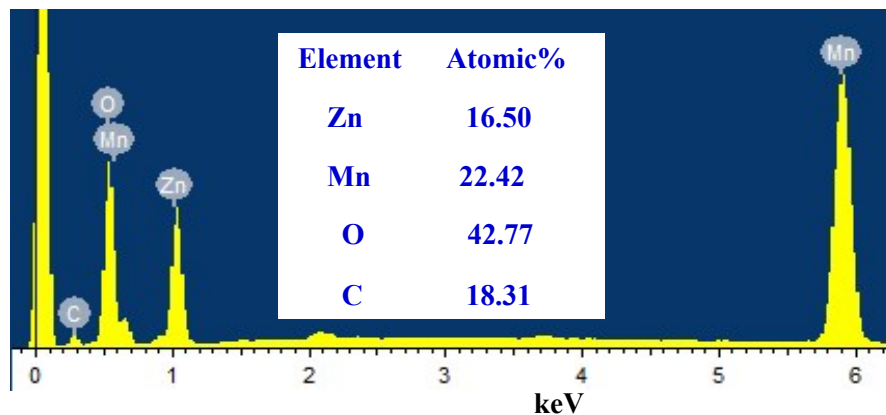

Figure SI-1 EDS of as-prepared ZnMn<sub>2</sub>O<sub>4</sub>

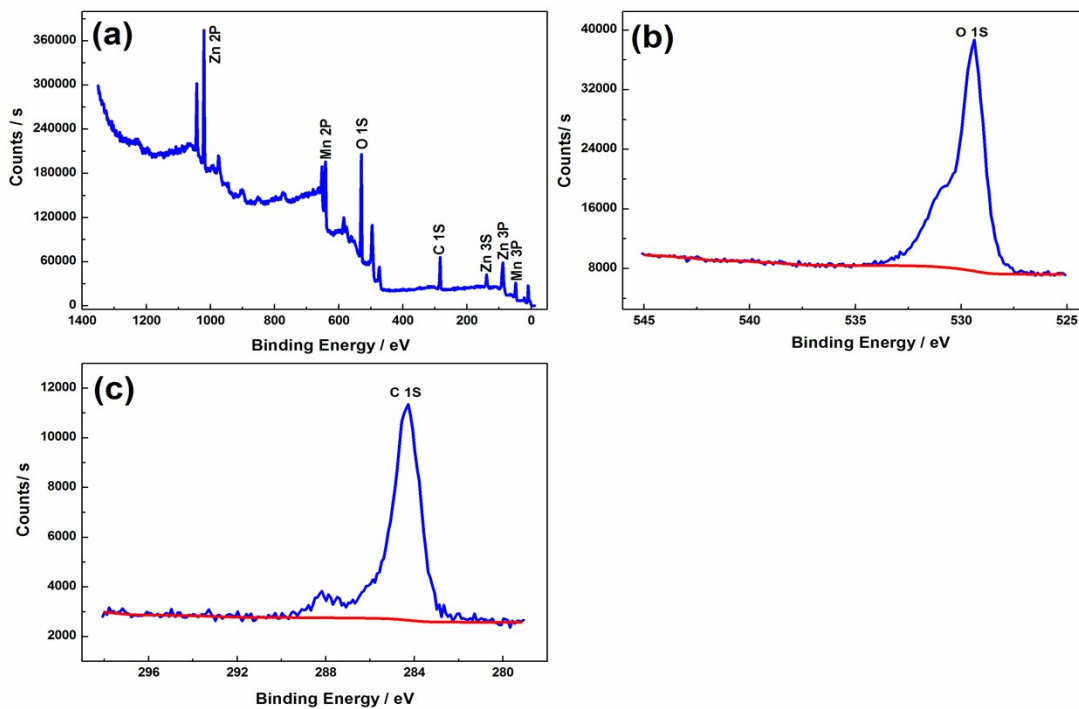

Figure SI-2 XPS spectra of the ZnMn<sub>2</sub>O<sub>4</sub> samples: (a) survey spectrum; (b) O 1s spectrum; (c) C1s spectrum

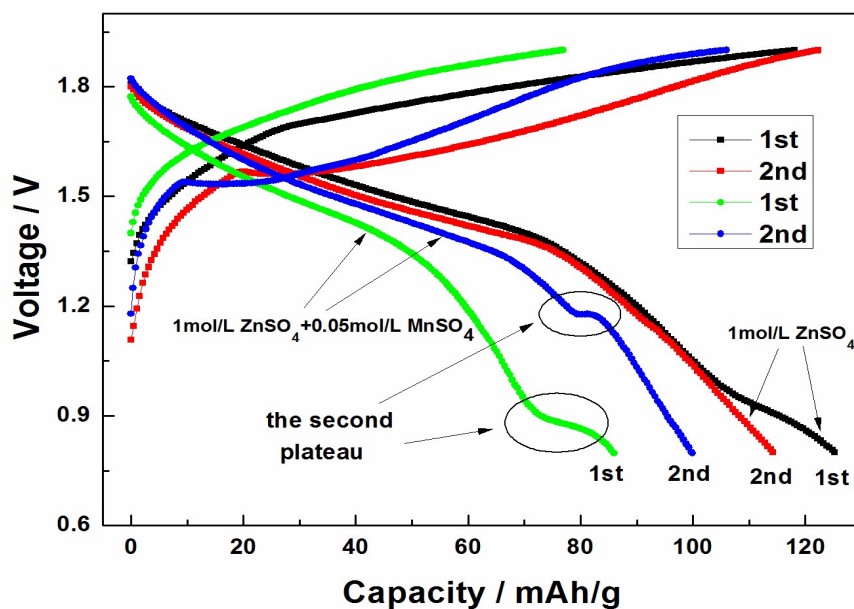

Figure SI-3 The charge/discharge curves of ZnMn<sub>2</sub>O<sub>4</sub>/Zn between 0.8~1.9 V with different electrolytes at 100 mA/g

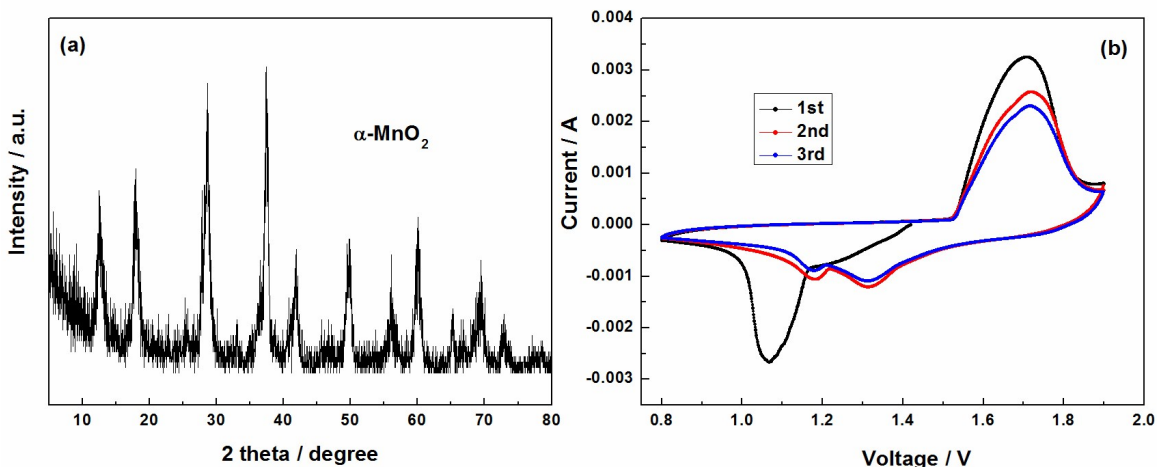

Figure SI-4 XRD of  $\alpha\text{-MnO}_2$  and the cyclic voltammetry curve of  $\text{MnO}_2/\text{Zn}$  based on 1 mol/L  $\text{ZnSO}_4$  with 0.05 mol/L  $\text{MnSO}_4$  in the range of 0.8~1.9 V at a scan rate of 1 mV/s

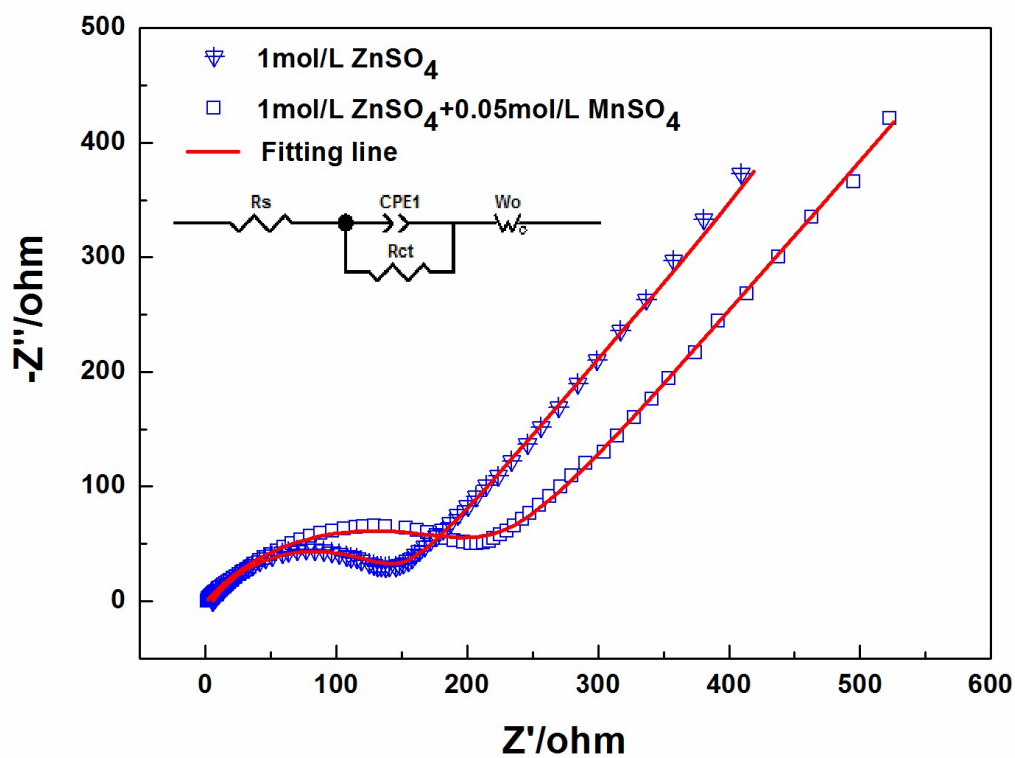

Figure SI-5 EIS spectra and the fitting curves of  $\text{ZnMn}_2\text{O}_4/\text{Zn}$  before cycling at 100 mA/g

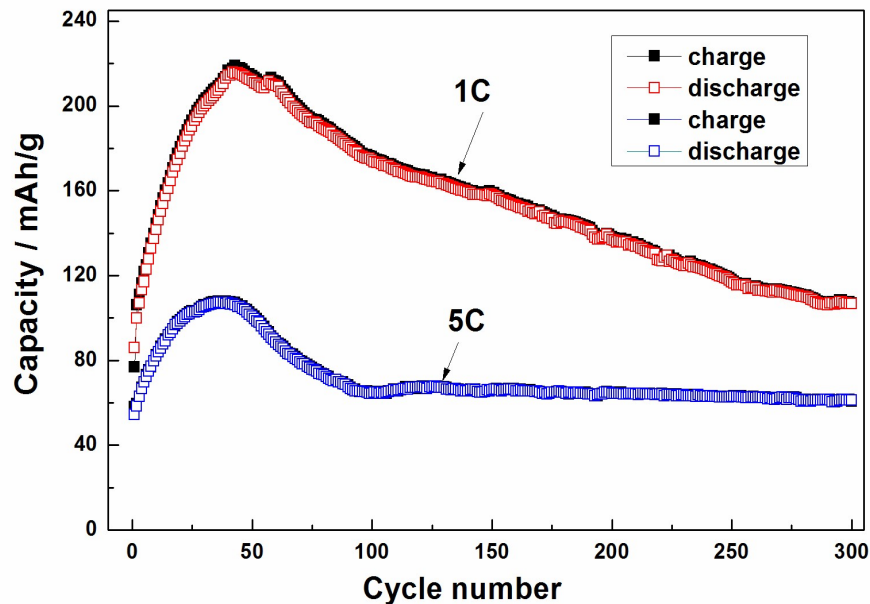

Figure SI-6 The cycling performance of ZnMn<sub>2</sub>O<sub>4</sub>/Zn at different C-rates

A typical cyclic voltammetry curve of Zn<sup>2+</sup>/Zn half-cell between -0.3~-1.5 V is shown in figure SI-7, and there is an inverted crossover “8” shape along the arrow direction. However, it can be noted that after adding 0.05 mol/L MnSO<sub>4</sub> into 1mol/L ZnSO<sub>4</sub>, the dissolution potential peak is decreased from -1.365 V to -1.372 V in figure SI-7 although the initial coulombic efficiency is decreased a little, demonstrating that MnSO<sub>4</sub> decreased the overpotential and facilitated Zn dissolution much easier. As can be seen from figure SI-8 that the deposition/dissolution curves nearly overlap with the cycle number increasing and there is no hydrogen evolution, indicating the good cycleability and high coulombic efficiency of anode.

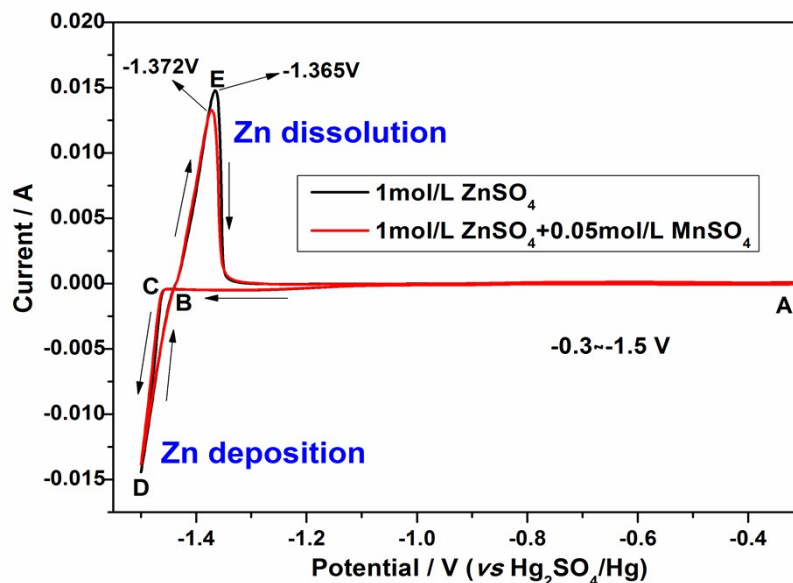

Figure SI-7 The initial deposition-dissolution process of zinc ion at a scan rate of 1 mV/s in different electrolyte

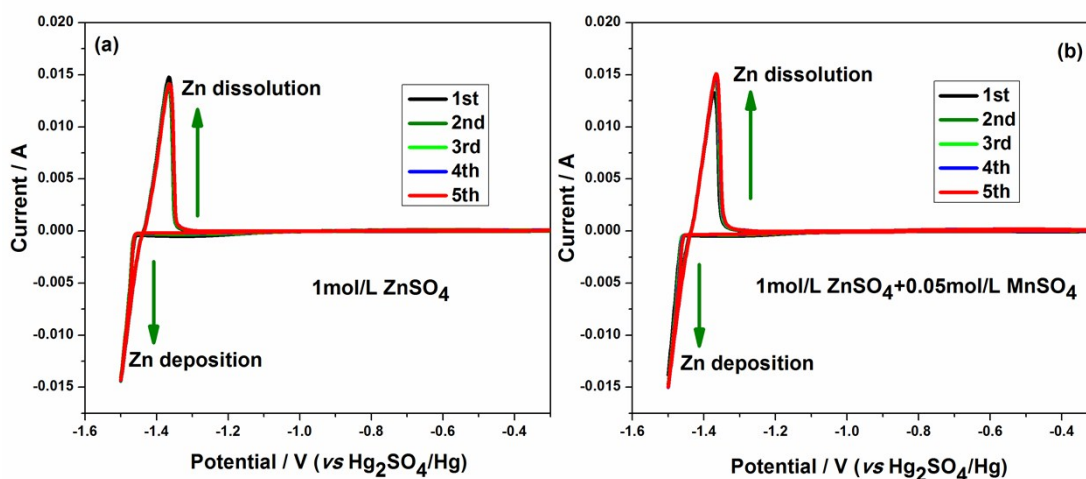

Figure SI-8 The deposition-dissolution process of zinc ion at a scan rate of 1 mV/s in different electrolyte (a, 1mol/L ZnSO<sub>4</sub>; b, 1mol/L ZnSO<sub>4</sub>+0.05mol/L MnSO<sub>4</sub>)

The diffusion kinetics of electrode based on the cyclic voltammetry at different scan rates were analyzed, which can be seen in figure SI-9. Compared figure SI-9 a with figure SI-9 c, after adding MnSO<sub>4</sub> into 1mol/L ZnSO<sub>4</sub>, the polarization phenomenon is decreased, which is consistent with the deposition/dissolution process of Zn<sup>2+</sup> in different electrolyte in figure SI-7. Notably, the two separate peaks are more obvious after adding MnSO<sub>4</sub>. It is well known that the

relationship between peak currents and scan rates indicates the different electrochemical reaction characteristics, including solid phase diffusion-controlled or surface-confined charge-transfer processes. As shown in figure SI-9 b and figure SI-9 d, there is a linear relationship between cathodic/anodic current peak and square root of scan rate, demonstrating the diffusion-controlled behavior. According to the Randle-Sevcik equation,  $i_p = 2.69 \times 10^5 n^{3/2} A D^{1/2} \nu^{1/2} C_0$  (25 °C), where  $i_p$  is the peak current (mA),  $n$  is the number of electrons per reaction species,  $A$  is the surface area of the electrode (with the geometric area of the electrode, 1.5385 cm<sup>2</sup>, used for simplicity in this work),  $D$  is the diffusion coefficient of Zn<sup>2+</sup> (cm<sup>2</sup>/s),  $\nu$  is the scan rate (V/s),  $C_0$  is the concentration of zinc ion (0.0436 mol/cm<sup>3</sup>, calculated by the cell parameters and cell volume), the slopes can be obtained in figure SI-9 b and figure SI-9 d. The calculated Zn<sup>2+</sup> diffusion coefficients in different electrolyte are 1.36×10<sup>-7</sup> cm<sup>2</sup>/s, 1.53×10<sup>-6</sup> cm<sup>2</sup>/s, respectively, indicating the higher ion diffusion behavior for the zinc ion aqueous battery. What's more, it is higher after adding MnSO<sub>4</sub> into 1mol/L ZnSO<sub>4</sub> than that without additive, which will show much better electrochemical performances for the former than that of the latter.

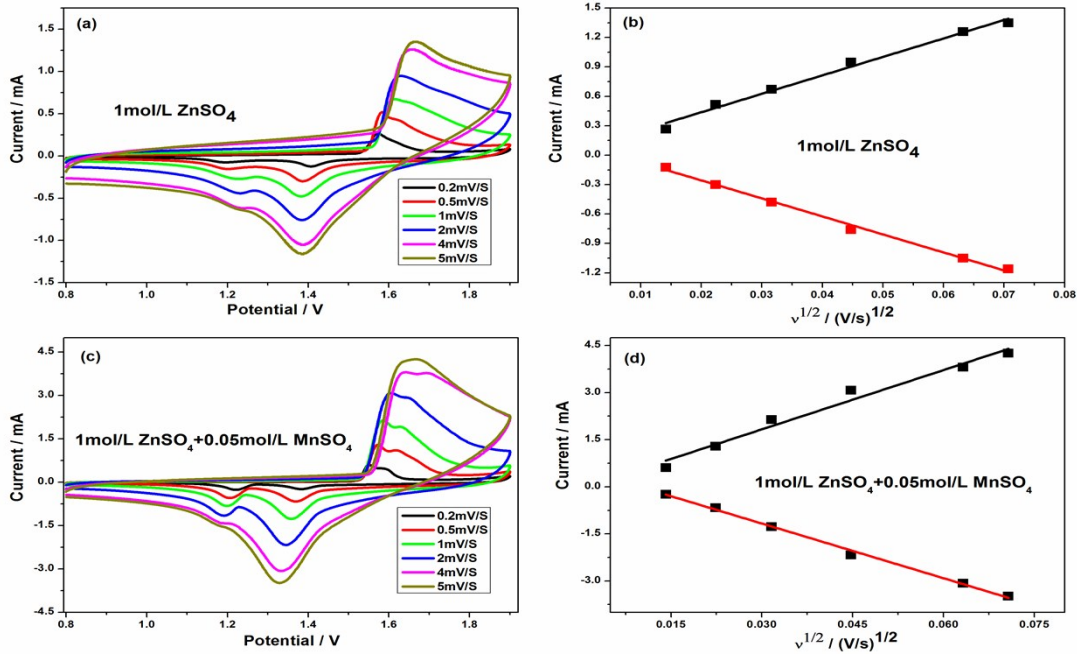

Figure SI-9 (a, c) the cyclic voltammograms of as-prepared ZnMn<sub>2</sub>O<sub>4</sub> at different scan rates and (b, d) the relationships between the peak current and square root of scan rate in the main cathodic and anodic processes

Table SI-1 Comparison of electrochemical properties of different cathode materials for ZIBs

| Samples                                                        | Electrolyte                                              | Cycling performance                                                                                        | Ref.         |
|----------------------------------------------------------------|----------------------------------------------------------|------------------------------------------------------------------------------------------------------------|--------------|
| $\alpha$ -MnO <sub>2</sub>                                     | 1 M ZnSO <sub>4</sub>                                    | 100 mAh g <sup>-1</sup> at 630 mA g <sup>-1</sup><br>with 76% capacity<br>retention after 100 cycles       | 1            |
| rod-like<br>MnO <sub>2</sub> /CNT                              | 2 M ZnSO <sub>4</sub> +0.5<br>M MnSO <sub>4</sub>        | 100 mAhg <sup>-1</sup> at 5 A g <sup>-1</sup> after 500<br>cycles                                          | 2            |
| $\alpha$ -MnO <sub>2</sub> nanorod                             | 1 M ZnSO <sub>4</sub>                                    | 147 mAh·g <sup>-1</sup> at 83 mA g <sup>-1</sup> with 63%<br>capacity retention after 50 cycles            | 3            |
| $\alpha$ -MnO <sub>2</sub> nanorod                             | 1 M ZnSO <sub>4</sub>                                    | 140 mAh g <sup>-1</sup> at 42 mA g <sup>-1</sup><br>with 70% capacity retention after<br>30 cycles         | 4            |
| $\alpha$ -MnO <sub>2</sub> nanorod                             | 1 M ZnSO <sub>4</sub>                                    | 104 mAh g <sup>-1</sup> at 83 mA g <sup>-1</sup><br>with 38.5% capacity retention after<br>75 cycles       | 5            |
| $\alpha$ -MnO <sub>2</sub> nanorod                             | 2 M ZnSO <sub>4</sub> + 0.1<br>M MnSO <sub>4</sub>       | 260 mAh g <sup>-1</sup> at 308 mA g <sup>-1</sup><br>after 60 cycles                                       | 6            |
| ZnHCFs                                                         | 1 M ZnSO <sub>4</sub>                                    | 49.7 mAh g <sup>-1</sup><br>at 60 mA g <sup>-1</sup> with 76% capacity<br>retention after 100 cycles       | 7            |
| ZnHCFs                                                         | 1 M ZnSO <sub>4</sub>                                    | 47.4 mAh g <sup>-1</sup><br>at 300 mA g <sup>-1</sup> with 80% capacity<br>retention after 200 cycles      | 8            |
| Na <sub>3</sub> V <sub>2</sub> (PO <sub>4</sub> ) <sub>3</sub> | 0.5M<br>Zn(CH <sub>3</sub> COO) <sub>2</sub>             | 97 mAh g <sup>-1</sup> at 0.5C with 74%<br>capacity retention after 100 cycles                             | 9            |
| Spinel-ZnMn <sub>1.86</sub> O <sub>4</sub>                     | 3 M<br>Zn(CF <sub>3</sub> SO <sub>3</sub> ) <sub>2</sub> | 80 mAh g <sup>-1</sup> at 500 mA g <sup>-1</sup><br>with 94% capacity retention after<br>500 cycles        | 10           |
| Spinel ZnMn <sub>2</sub> O <sub>4</sub>                        | 1 M<br>ZnSO <sub>4</sub> +0.05M<br>MnSO <sub>4</sub>     | 106.5 mAh g <sup>-1</sup> at 100 mA g <sup>-1</sup> with<br>123.87% capacity retention after<br>300 cycles | This<br>work |

Table SI-2 Impedance parameters of equivalent circuit of ZnMn<sub>2</sub>O<sub>4</sub>/Zn

| No. | Electrolyte                                           | Rs (ohm) | Rct (ohm) |
|-----|-------------------------------------------------------|----------|-----------|
| 1#  | 1mol/L ZnSO <sub>4</sub>                              | 5.599    | 138.4     |
| 2#  | 1mol/L ZnSO <sub>4</sub> +0.05mol/L MnSO <sub>4</sub> | 1.265    | 214.5     |

- [1] C.J. Xu, B.H. Li, H.D. Du, F.Y. Kang. *Angew. Chem.*, 2012, 124, 957.
- [2] D.W. Xu, B.H. Li, C.G. Wei, Y.B. He, H.D. Du, X.D. Chu, X.Y. Qin, Q.H. Yang, F.Y. Kang. *Electrochim. Acta*, 2014, 133: 254.
- [3] M.H. Alfaruqi, J. Gim, S.J. Kim, J.J. Song, J. Jo, S.H. Kim, V. Mathew, J. Kim. *J. Power Sources*, 2015, 288: 320.
- [4] B. Lee, H.R. Li, H. Kim, K.Y. Chung, B.W. Cho, S.H. Oh. *Chem. Commun.* 2015, 51, 9265.
- [5] M.H. Alfaruqi, S. Islam, J. Gim, J.J. Song, S.J. Kim, D.T. Pham, J. Jo, Z.L. Xiu, V. Mathew, J. Kim. *Chem. Phys. Lett.*, 2016, 650: 64.
- [6] H.L. Pan, Y.Y. Shao, P.F. Yan, Y.W. Cheng, K.S. Han, Z.M. Nie, C.M. Wang, J.H. Yang, X.L. Li, P. Bhattacharya, K.T. Mueller, J. Liu. *Nat. Energy*, 2016, 1:16039.
- [7] L.Y. Zhang, L. Chen, X.F. Zhou, Z.P. Liu. *Adv. Energy Mater.* 2015, 5(2):1400930.
- [8] L.Y. Zhang, L. Chen, X.F. Zhou, Z.P. Liu. *Scientific Reports.*, 2016, 5:18263.
- [9] G.L. Li, Z. Yang, Y. Jiang, C.H. Jin, W. Huang, X.L. Ding, Y.H. Huang. *Nano Energy*, 2016, 25: 211.
- [10] N. Zhang, F.Y. Cheng, Y.C. Liu, Q. Zhao, K.X. Lei, C.C. Chen, X.S. Liu, J. Chen. *J. Am. Chem. Soc.*, 2016, 138 (39):12894.
